# Supplementary material for: Formation and reactivity of an (alkene)peroxoiridium(iii) intermediate supported by an amidinato ligand
Source: Royal Society of Chemistry journal article supplement (doi:10.1039/c3dt52283k), 2013-10-14
Supplement: c3dt52283k.pdf [file c3dt52283k.pdf]

## Electronic Supplementary Information

### Formation and reactivity of an (alkene)peroxoiridium(III) intermediate supported by an amidinato ligand

Matthew R. Kelley and Jan-Uwe Rohde\*

Department of Chemistry, The University of Iowa, Iowa City, IA 52242

| Contents                                                                                                                                                      | Page |
|---------------------------------------------------------------------------------------------------------------------------------------------------------------|------|
| Table S1. Additional crystal and data collection parameters for <b>1</b>                                                                                      | S2   |
| Table S2. Selected interatomic distances for <b>1</b>                                                                                                         | S2   |
| Table S3. Selected angles for <b>1</b>                                                                                                                        | S3   |
| Table S4. Selected dihedral angles for <b>1</b>                                                                                                               | S3   |
| Figure S1. High-resolution electron impact ionization mass spectrum of <b>2</b>                                                                               | S4   |
| Figure S2. Solid-state IR spectrum <b>2</b>                                                                                                                   | S4   |
| Figure S3. $^1\text{H}$ , $^1\text{H}$ COSY spectrum of <b>3</b>                                                                                              | S5   |
| Figure S4. $^1\text{H}$ , $^{13}\text{C}$ HSQC spectrum of <b>3</b>                                                                                           | S6   |
| Table S5. $^1\text{H}$ and $^{13}\text{C}$ chemical shifts from the $^1\text{H}$ , $^{13}\text{C}$ HSQC spectrum of <b>3</b>                                  | S6   |
| Determination of the Self-Diffusion Coefficients of <b>1</b> and <b>3</b>                                                                                     | S7   |
| Figure S5. Plots of $\ln(I/I_0)$ as a function of $G^2$ for <b>1</b> and <b>3</b>                                                                             | S8   |
| Figure S6. Solid-state IR spectra of <b>1</b> , <b>3</b> , <b>3</b> - $^{18}\text{O}_2$ , and the decay products of <b>3</b> and <b>3</b> - $^{18}\text{O}_2$ | S9   |
| Table S6. IR absorption bands of <b>2</b> and <b>3</b> (2200–1200 $\text{cm}^{-1}$ )                                                                          | S10  |
| Figure S7. Electronic absorption spectra of <b>1</b> and <b>3</b> in toluene and the solution during decay of <b>3</b>                                        | S10  |
| Table S7. Mass spectrometric data of the decay products of <b>3</b> and <b>3</b> - $^{18}\text{O}_2$                                                          | S10  |

**Table S1.** Additional crystal and data collection parameters for  $[\text{Ir}\{\text{PhNC}(\text{Me})\text{NPh}\}(\text{cod})]$ , **1**.

| <b>1</b>                           |                                                              |
|------------------------------------|--------------------------------------------------------------|
| Crystal habit, color               | blade, orange                                                |
| Crystal size                       | 0.27 x 0.07 x 0.01 mm <sup>3</sup>                           |
| $F(000)$                           | 992                                                          |
| $\theta$ range for data collection | 2.50 to 25.37°                                               |
| Limiting indices                   | $-13 \leq h \leq 13, -13 \leq k \leq 12, -16 \leq l \leq 16$ |
| Completeness to $\theta$           | 99.3 % ( $\theta = 25.37^\circ$ )                            |
| Max. and min. transmission         | 0.9473 and 0.2435                                            |
| Refinement method                  | Full-matrix least-squares on $F^2$                           |

**Table S2.** Selected interatomic distances (Å) for  $[\text{Ir}\{\text{PhNC}(\text{Me})\text{NPh}\}(\text{cod})]$ , **1**.<sup>a</sup>

| Molecule A |           | Molecule B |           |
|------------|-----------|------------|-----------|
| Ir1–N1     | 2.094(6)  | Ir2–N3     | 2.100(6)  |
| Ir1–N2     | 2.077(7)  | Ir2–N4     | 2.076(7)  |
| Ir1–C15    | 2.102(8)  | Ir2–C37    | 2.099(8)  |
| Ir1–C16    | 2.129(9)  | Ir2–C38    | 2.132(9)  |
| Ir1–C19    | 2.102(8)  | Ir2–C41    | 2.099(8)  |
| Ir1–C20    | 2.105(8)  | Ir2–C42    | 2.127(8)  |
|            |           |            |           |
| N1–C1      | 1.323(10) | N3–C23     | 1.336(10) |
| N1–C2      | 1.394(10) | N3–C24     | 1.390(9)  |
| N2–C1      | 1.339(10) | N4–C23     | 1.334(10) |
| N2–C8      | 1.416(10) | N4–C30     | 1.426(10) |
| C1–C14     | 1.506(10) | C23–C36    | 1.510(11) |
| C15–C16    | 1.429(12) | C37–C38    | 1.421(12) |
| C19–C20    | 1.398(12) | C41–C42    | 1.418(12) |

<sup>a</sup> Numbers in parentheses are standard uncertainties in the last significant figures. Atoms are labeled as indicated in Figure 1.

**Table S3.** Selected angles (°) for [Ir{PhNC(Me)NPh}(cod)], **1**.<sup>a</sup>

| Molecule A  |          | Molecule B  |          |
|-------------|----------|-------------|----------|
| N2–Ir1–N1   | 62.7(3)  | N4–Ir2–N3   | 62.8(2)  |
| N1–Ir1–C15  | 102.0(3) | C37–Ir2–N3  | 102.7(3) |
| N1–Ir1–C16  | 107.2(3) | N3–Ir2–C38  | 107.6(3) |
| N1–Ir1–C19  | 156.1(3) | C41–Ir2–N3  | 155.0(3) |
| N1–Ir1–C20  | 157.1(3) | N3–Ir2–C42  | 158.1(3) |
| N2–Ir1–C19  | 101.3(3) | N4–Ir2–C41  | 100.8(3) |
| N2–Ir1–C20  | 105.2(3) | N4–Ir2–C42  | 105.6(3) |
| N2–Ir1–C15  | 156.0(3) | N4–Ir2–C37  | 156.0(3) |
| N2–Ir1–C16  | 158.3(3) | N4–Ir2–C38  | 159.1(3) |
| C15–Ir1–C16 | 39.5(3)  | C37–Ir2–C38 | 39.2(3)  |
| C19–Ir1–C20 | 38.8(3)  | C41–Ir2–C42 | 39.2(3)  |
| C15–Ir1–C19 | 98.4(3)  | C37–Ir2–C41 | 98.5(3)  |
| C15–Ir1–C20 | 82.1(3)  | C37–Ir2–C42 | 81.0(3)  |
| C19–Ir1–C16 | 81.2(3)  | C41–Ir2–C38 | 81.1(3)  |
| C20–Ir1–C16 | 90.3(3)  | C42–Ir2–C38 | 89.1(3)  |
| C1–N1–C2    | 127.0(7) | C23–N3–C24  | 127.8(7) |
| C1–N1–Ir1   | 93.9(5)  | C23–N3–Ir2  | 93.4(5)  |
| C2–N1–Ir1   | 138.4(5) | C24–N3–Ir2  | 138.3(6) |
| C1–N2–C8    | 129.4(7) | C23–N4–C30  | 128.1(7) |
| C1–N2–Ir1   | 94.1(5)  | C23–N4–Ir2  | 94.5(5)  |
| C8–N2–Ir1   | 136.1(5) | C30–N4–Ir2  | 137.0(5) |
| N1–C1–N2    | 109.2(7) | N4–C23–N3   | 109.1(7) |
| N1–C1–C14   | 126.8(7) | N3–C23–C36  | 126.0(7) |
| N2–C1–C14   | 123.9(8) | N4–C23–C36  | 124.9(8) |

<sup>a</sup> Numbers in parentheses are standard uncertainties in the last significant figures. Atoms are labeled as indicated in Figure 1.

**Table S4.** Selected dihedral angles (°) for [Ir{PhNC(Me)NPh}(cod)], **1**.<sup>a</sup>

| Molecule A                             |         | Molecule B                               |         |
|----------------------------------------|---------|------------------------------------------|---------|
| N1–C1–N2 / N1–Ir1–N2                   | 3.6(8)  | N3–C23–N4 / N3–Ir2–N4                    | 4.6(8)  |
| N1–Ir1–N2 / C15–Ir1–C16                | 82.1(4) | N3–Ir2–N4 / C37–Ir2–C38                  | 82.9(5) |
| N1–Ir1–N2 / C19–Ir1–C20                | 83.9(5) | N3–Ir2–N4 / C41–Ir2–C42                  | 82.8(5) |
| C15–Ir1–C16 / C19–Ir1–C20              | 87.1(4) | C37–Ir2–C38 / C41–Ir2–C42                | 86.2(4) |
| (N1,C1,N2,C14) / (C2→C7) <sup>b</sup>  | 41.8(4) | (N3,C23,N4,C36) / (C24→C29) <sup>b</sup> | 37.6(4) |
| (N1,C1,N2,C14) / (C8→C13) <sup>b</sup> | 54.3(3) | (N3,C23,N4,C36) / (C30→C35) <sup>b</sup> | 56.1(3) |

<sup>a</sup> Numbers in parentheses are standard uncertainties in the last significant figures. Atoms are labeled as indicated in Figure 1. <sup>b</sup> Angle between the least-squares planes of the amidinate atoms (*e.g.*, N1, C1, N2, and C14) and the aryl ring atoms (*e.g.*, C2, C3, C4, C5, C6, and C7).

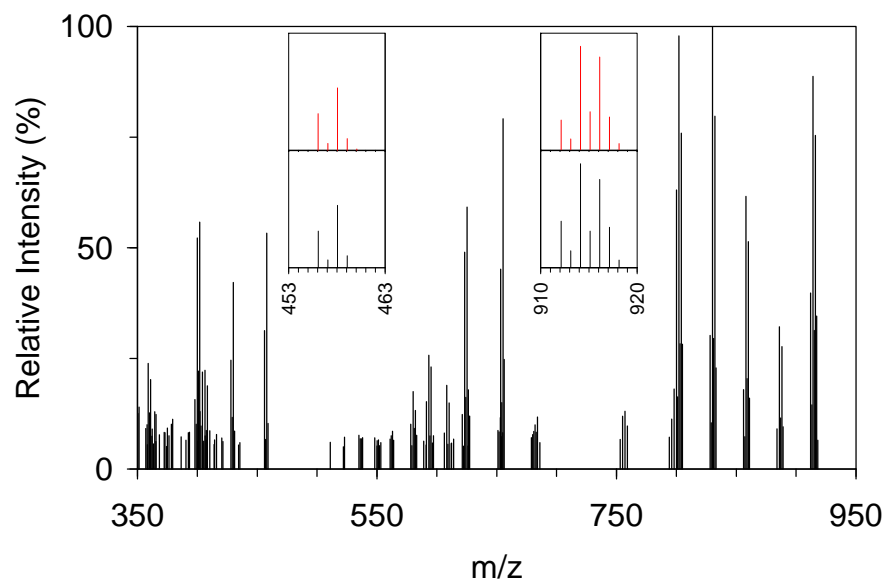

**Figure S1.** High-resolution electron impact ionization mass spectrum of **2**. Insets: Expanded views of the features attributed to  $2^{+}$  and  $\{2/2\}^{++}$  (bottom, —, black) and their calculated isotope distribution patterns (top, —, red).

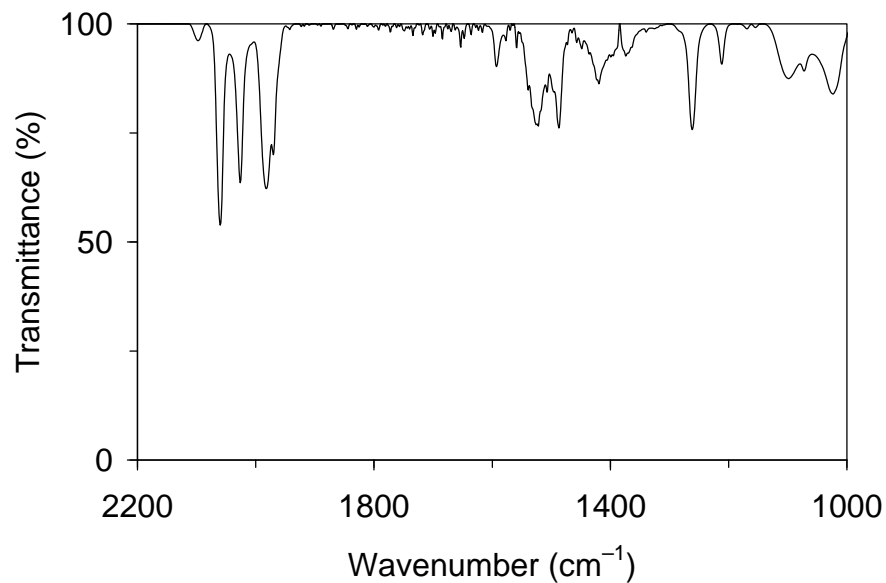

**Figure S2.** Solid-state IR spectrum (KBr) of **2**.

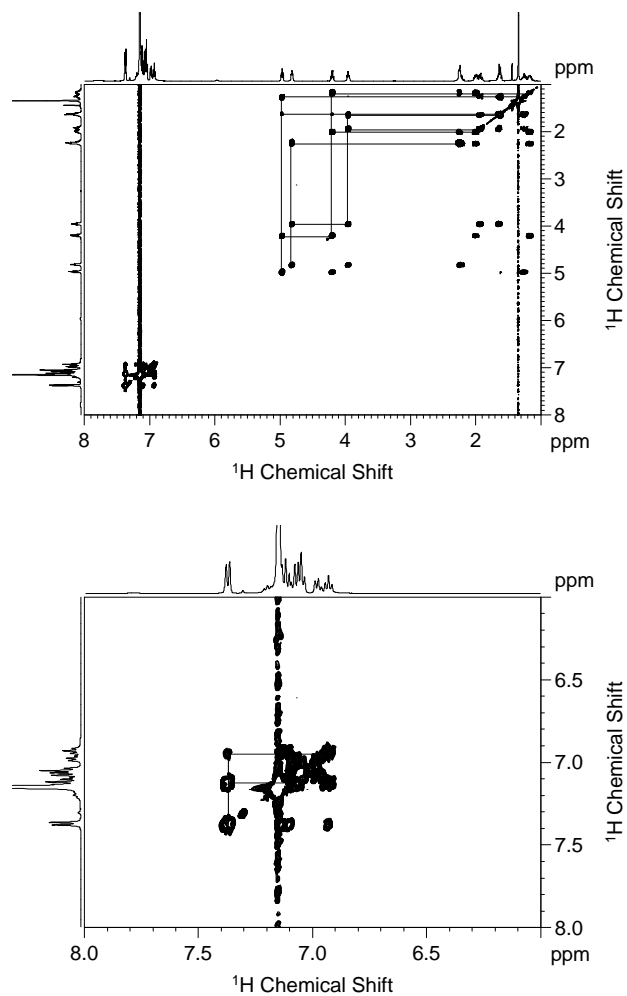

**Figure S3.** Top:  $^1\text{H}$ ,  $^1\text{H}$  COSY spectrum of **3** in benzene- $d_6$  (ca. 15 mM, 500 MHz, 25 °C). The solid lines indicate correlations among alkene proton resonances and between alkene and methylene proton resonances. Bottom: Expanded view of the aromatic region of the  $^1\text{H}$ ,  $^1\text{H}$  COSY spectrum of **3**. The solid lines indicate correlations among aromatic proton resonances.

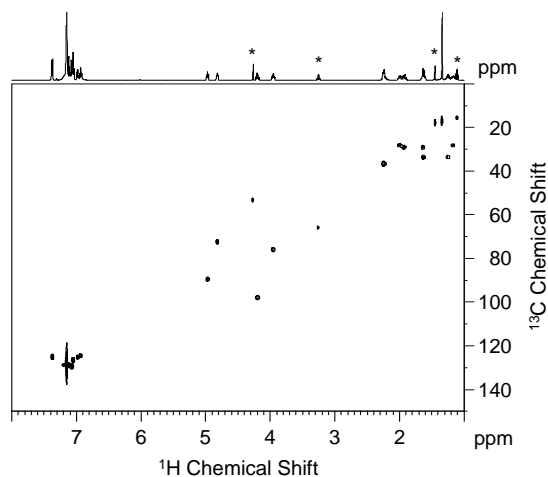

**Figure S4.**  $^1\text{H}$ ,  $^{13}\text{C}$  HSQC spectrum of **3** in benzene- $d_6$  (ca. 15 mM, 500 MHz, 25 °C). The asterisks denote solvent peaks ( $\text{CH}_2\text{Cl}_2$ ,  $\text{Et}_2\text{O}$ , and an unknown contaminant).

**Table S5.**  $^1\text{H}$  and  $^{13}\text{C}$  chemical shifts,  $\delta$ (ppm), from the  $^1\text{H}$ ,  $^{13}\text{C}$  heteronuclear single-quantum coherence (HSQC) spectrum of  $[\text{Ir}\{\text{PhNC}(\text{Me})\text{NPh}\}\{\text{cod}\}(\text{O}_2)]$  (**3**) in benzene- $d_6$ .

| Assignment           |                         | $\delta(^1\text{H})$ | $\delta(^{13}\text{C})$ |
|----------------------|-------------------------|----------------------|-------------------------|
| Ar                   | Group A                 | 7.37                 | 125.1                   |
|                      |                         | 7.12 <sup>a</sup>    | 128.8 <sup>a</sup>      |
|                      |                         | 6.93                 | 124.4                   |
|                      | Group B                 | 7.07                 | 129.4                   |
|                      |                         | 7.05                 | 126.5                   |
|                      |                         | 6.97                 | 125.2                   |
| =CHCH <sub>2</sub> - | 1-H, C-1                | 4.82                 | 72.4                    |
|                      | 2-H, C-2                | 3.95                 | 75.8                    |
|                      | 5-H, C-5                | 4.97                 | 89.5                    |
|                      | 6-H, C-6                | 4.20                 | 97.8                    |
| =CHCH <sub>2</sub> - | 3-H <sub>ab</sub> , C-3 | 1.92, 1.64           | 29.0                    |
|                      | 4-H <sub>ab</sub> , C-4 | 1.64, 1.26           | 33.6                    |
|                      | 7-H <sub>ab</sub> , C-7 | 1.99, 1.17           | 28.1                    |
|                      | 8-H <sub>ab</sub> , C-8 | 2.23                 | 36.6                    |
| CCH <sub>3</sub>     |                         | 1.34                 | 17.1                    |

<sup>a</sup> The resonance signals centered at  $\delta(^1\text{H}) = 7.12$  ppm and  $\delta(^{13}\text{C}) = 128.8$  ppm partially overlap with the residual solvent peaks.

## Determination of the Self-Diffusion Coefficients of **1** and **3**

Diffusion  $^1\text{H}$  NMR experiments to determine  $D$  values were conducted in triplicate, and, for each experiment, data of seven (**1**) or ten (**3**) suitable peaks were averaged. The average  $D$  values from three measurements were  $(8.8 \pm 0.2) \cdot 10^{-10}$  and  $(8.3 \pm 0.1) \cdot 10^{-10} \text{ m}^2 \cdot \text{s}^{-1}$  for **1** and **3**, respectively (ca. 17 mM **1** and ca. 15 mM **3** in benzene- $d_6$ , 400 MHz, 25 °C). Intermediate **3** was found to decay by  $\leq 10\%$  over the course of each measurement, introducing a minor error into  $D$ . Shown below are representative results for the CCH<sub>3</sub> resonance signals of **1** and **3**. The plots in Figure S5 confirm the expected linear relationship between  $\ln(I/I_0)$  and  $G^2$ .

SIMFIT RESULTS for **1**

=====

INTENSITY fit : Diffusion : Variable Gradient :  
 $I = I[0] \cdot \exp(-D \cdot \text{SQR}(2 \cdot \text{PI} \cdot \text{gamma} \cdot \text{Gi} \cdot \text{LD}) \cdot (\text{BD} - \text{LD}/3) \cdot 1e4)$   
16 points for Peak 6, CCH3 resonance signal  
Converged after 32 iterations!

Results            Comp. 1  
I[0]                = 9.998e-001  
Diff Con.           = 8.704e-010 m2/s  
Gamma              = 4.258e+003 Hz/G  
Little Delta       = 5.000m  
Big Delta          = 26.950m

RSS    = 7.767e-006  
SD     = 6.967e-004

| Point | Gradient   | Expt       | Calc       | Difference  |
|-------|------------|------------|------------|-------------|
| 1     | 6.740e-001 | 1.000e+000 | 9.980e-001 | -1.962e-003 |
| 2     | 2.765e+000 | 9.696e-001 | 9.702e-001 | 5.493e-004  |
| 3     | 4.855e+000 | 9.101e-001 | 9.112e-001 | 1.125e-003  |
| 4     | 6.945e+000 | 8.262e-001 | 8.269e-001 | 6.820e-004  |
| 5     | 9.036e+000 | 7.254e-001 | 7.250e-001 | -4.898e-004 |
| 6     | 1.113e+001 | 6.139e-001 | 6.141e-001 | 2.269e-004  |
| 7     | 1.322e+001 | 5.027e-001 | 5.026e-001 | -7.296e-005 |
| 8     | 1.531e+001 | 3.970e-001 | 3.975e-001 | 4.937e-004  |
| 9     | 1.740e+001 | 3.036e-001 | 3.037e-001 | 1.016e-004  |
| 10    | 1.949e+001 | 2.239e-001 | 2.241e-001 | 2.867e-004  |
| 11    | 2.158e+001 | 1.601e-001 | 1.599e-001 | -2.598e-004 |
| 12    | 2.367e+001 | 1.111e-001 | 1.102e-001 | -9.175e-004 |
| 13    | 2.576e+001 | 7.375e-002 | 7.334e-002 | -4.055e-004 |
| 14    | 2.785e+001 | 4.754e-002 | 4.718e-002 | -3.589e-004 |
| 15    | 2.994e+001 | 2.946e-002 | 2.932e-002 | -1.381e-004 |
| 16    | 3.203e+001 | 1.778e-002 | 1.761e-002 | -1.705e-004 |

=====

SIMFIT RESULTS for **3**

=====

INTENSITY fit : Diffusion : Variable Gradient :  
 $I = I[0] \cdot \exp(-D \cdot \text{SQR}(2 \cdot \text{PI} \cdot \text{gamma} \cdot \text{Gi} \cdot \text{LD}) \cdot (\text{BD} - \text{LD}/3) \cdot 1e4)$   
16 points for Peak 11, CCH3 resonance signal  
Converged after 35 iterations!

Results      Comp. 1  
I[0]            = 1.020e+000  
Diff Con.       = 8.276e-010 m2/s  
Gamma           = 4.258e+003 Hz/G  
Little Delta    = 5.000m  
Big Delta       = 26.950m

RSS    = 6.609e-004  
SD     = 6.427e-003

| Point | Gradient   | Expt       | Calc       | Difference  |
|-------|------------|------------|------------|-------------|
| 1     | 6.740e-001 | 1.000e+000 | 1.018e+000 | 1.838e-002  |
| 2     | 2.765e+000 | 9.892e-001 | 9.913e-001 | 2.142e-003  |
| 3     | 4.855e+000 | 9.435e-001 | 9.340e-001 | -9.517e-003 |
| 4     | 6.945e+000 | 8.625e-001 | 8.516e-001 | -1.095e-002 |
| 5     | 9.036e+000 | 7.600e-001 | 7.514e-001 | -8.534e-003 |
| 6     | 1.113e+001 | 6.420e-001 | 6.418e-001 | -1.807e-004 |
| 7     | 1.322e+001 | 5.283e-001 | 5.304e-001 | 2.104e-003  |
| 8     | 1.531e+001 | 4.210e-001 | 4.243e-001 | 3.326e-003  |
| 9     | 1.740e+001 | 3.275e-001 | 3.285e-001 | 1.053e-003  |
| 10    | 1.949e+001 | 2.454e-001 | 2.461e-001 | 6.947e-004  |
| 11    | 2.158e+001 | 1.769e-001 | 1.785e-001 | 1.571e-003  |
| 12    | 2.367e+001 | 1.217e-001 | 1.253e-001 | 3.599e-003  |
| 13    | 2.576e+001 | 8.360e-002 | 8.508e-002 | 1.482e-003  |
| 14    | 2.785e+001 | 5.539e-002 | 5.593e-002 | 5.395e-004  |
| 15    | 2.994e+001 | 3.593e-002 | 3.558e-002 | -3.495e-004 |
| 16    | 3.203e+001 | 2.194e-002 | 2.191e-002 | -3.130e-005 |

=====

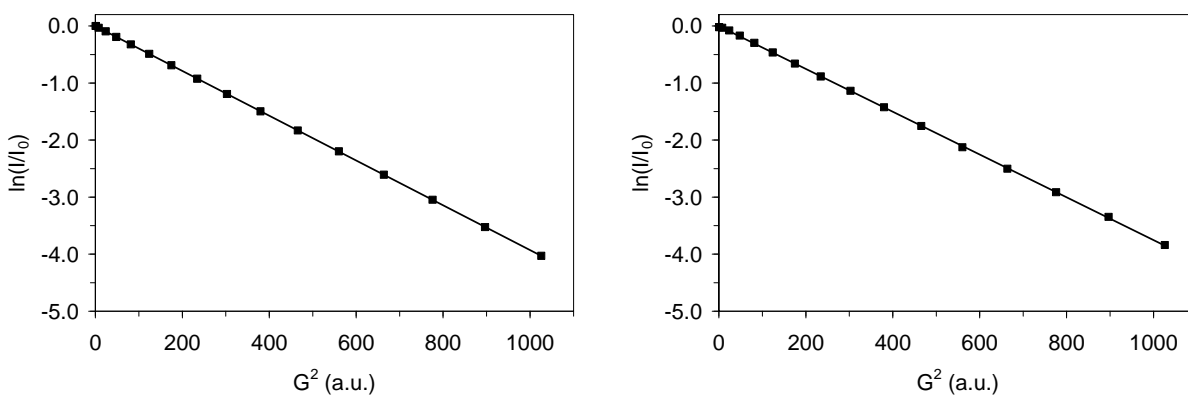

**Figure S5.** Plots of the natural logarithm of the intensity quotient,  $\ln(I/I_0)$ , as a function of the square of the gradient strength,  $G^2$ , for the CCH<sub>3</sub> resonance signals of **1** (left;  $R^2 = 0.999998$ ) and **3** (right;  $R^2 = 0.999919$ ) in benzene-*d*<sub>6</sub> (ca. 17 mM **1** and ca. 15 mM **3**, 400 MHz, 25 °C).



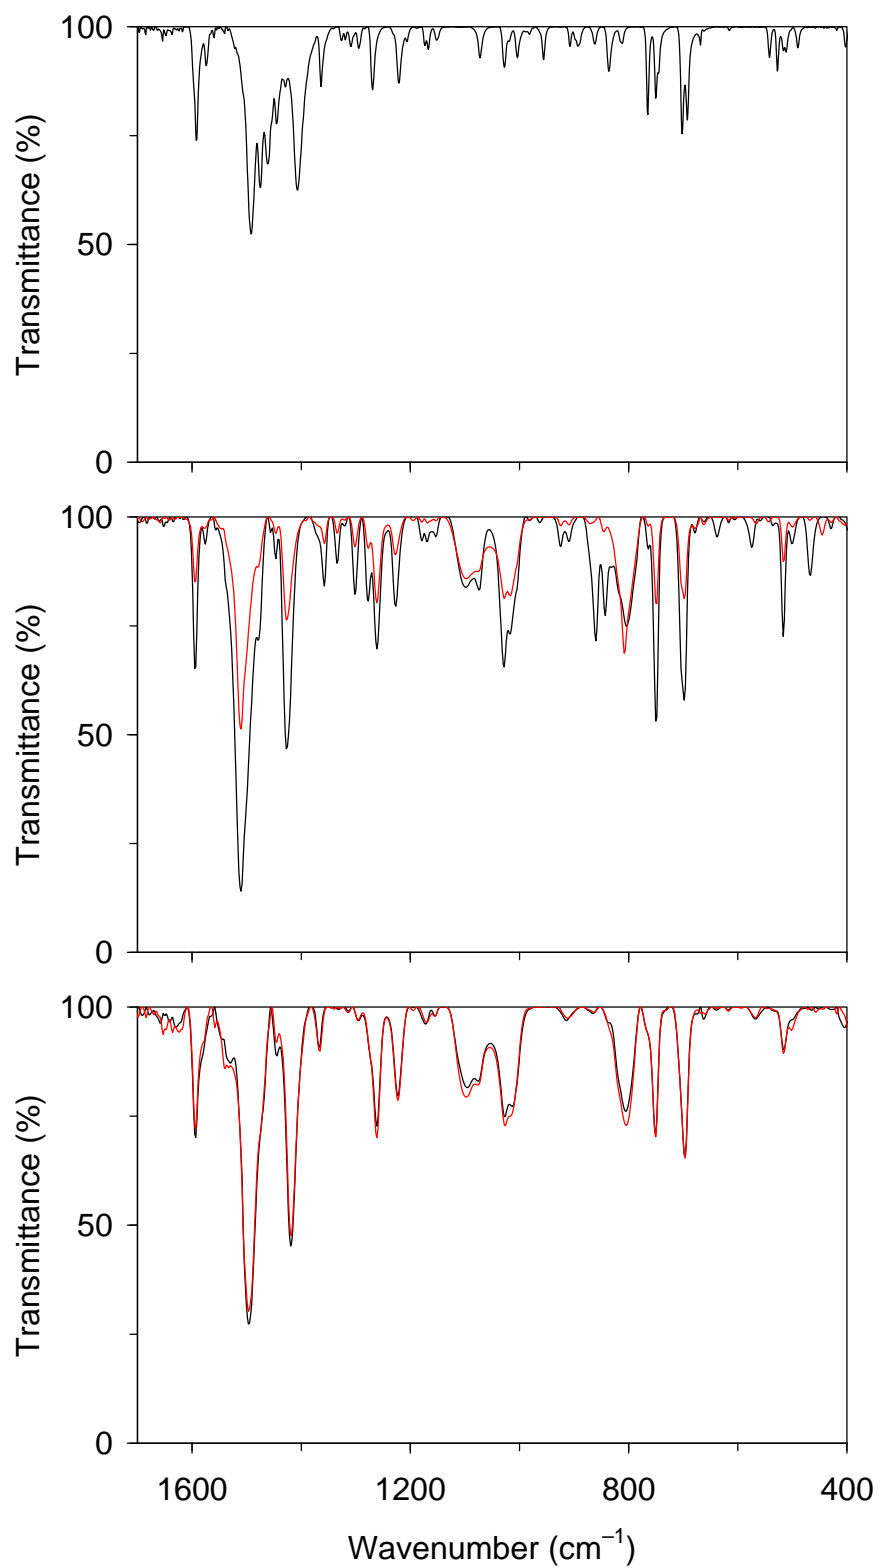

**Figure S6.** Solid-state IR spectra (KBr) of **1** (top), **3** (middle) and the decay products of **3** (bottom). Spectra of **3**-<sup>18</sup>O<sub>2</sub> and its decay products are shown in red (—).

**Table S6.** IR absorption bands of [ $\{\text{Ir}(\text{CO})_2\}_2\{\mu\text{-PhNC}(\text{Me})\text{NPh-}\kappa\text{N}:\kappa\text{N}'\}_2$ ] (**2**) and [ $\text{Ir}\{\text{PhNC}(\text{Me})\text{NPh}\}(\text{cod})(\text{O}_2)$ ] (**3**) (2200–1200  $\text{cm}^{-1}$ ).<sup>a</sup>

| Complex  | $\nu_{\text{CO}}$ ( $\text{cm}^{-1}$ )    | $\nu$ ( $\text{cm}^{-1}$ )                                         |
|----------|-------------------------------------------|--------------------------------------------------------------------|
| <b>2</b> | 2060 (s), 2026 (s),<br>1985 (s), 1970 (m) | 1593, 1524, 1487, 1419, 1262, 1212                                 |
| <b>3</b> |                                           | 1594, 1510, 1479 (sh), 1427, 1358, 1334, 1301, 1277,<br>1261, 1227 |

<sup>a</sup> Solid state (KBr disk).

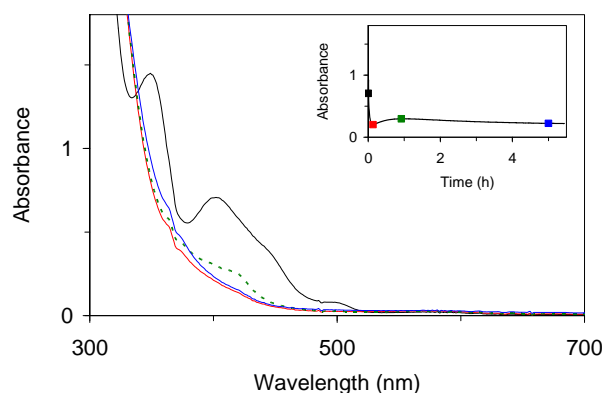

**Figure S7.** Electronic absorption spectra of 1 mM **1** in toluene at 0 °C (—, black), **3** generated from the reaction of **1** with  $\text{O}_2$  (—, red), and the solution during decay of **3** (---, green; and —, blue; path length, 0.5 cm). Inset: Time course of the reaction of **1** in toluene with  $\text{O}_2$  at 0 °C and subsequent decay of **3** ( $\lambda = 402$  nm). The squares indicate the reaction times associated with the spectra shown (black, **1**; red, **3**; green and blue, solution during decay of **3**).

**Table S7.** Mass-to-charge ratios ( $m/z$ ) from the electrospray ionization (ESI) and electron impact (EI) mass spectra of the decay products of [ $\text{Ir}\{\text{PhNC}(\text{Me})\text{NPh}\}(\text{cod})(\text{O}_2)$ ] (**3**).<sup>a-c</sup>

|                             | ESI(+)<br>MS                 |                                         |                                |                               | EIMS                                       |                         |
|-----------------------------|------------------------------|-----------------------------------------|--------------------------------|-------------------------------|--------------------------------------------|-------------------------|
|                             | $\{\text{LH} + \text{H}\}^+$ | $\{\mathbf{3} - \text{O}_2\text{H}\}^+$ | $\{\mathbf{3} - \text{OH}\}^+$ | $\{\mathbf{3} - \text{H}\}^+$ | $\{\mathbf{3} - \text{H}_2\text{O}\}^{++}$ | $\{\text{IrL}_3\}^{++}$ |
| Found                       | 211.2                        | 509.4                                   | 525.2                          | 541.2                         | 524.1397                                   | 820.2827                |
| Calcd                       | 211.1                        | 509.2                                   | 525.2                          | 541.2                         | 524.1440                                   | 820.2866                |
| Found ( $^{18}\text{O}_2$ ) | 211.3                        | 509.5                                   | 527.4                          | 545.4                         | 526.3                                      | 820.4                   |

<sup>a</sup> The reaction of [ $\text{Ir}\{\text{PhNC}(\text{Me})\text{NPh}\}(\text{cod})$ ] (**1**) with  $\text{O}_2$  (or  $^{18}\text{O}_2$ ) was carried out as described in the Experimental Section, and the resulting solution was allowed to stand for at least 16 h. <sup>b</sup> LH =  $\text{PhN}=\text{C}(\text{Me})\text{NPh}$ .

<sup>c</sup> High-resolution mass spectral data are reported with four decimal places.
